# Supplementary material
Source: Royal Society of Chemistry journal article supplement (doi:10.1039/d5ew01105a)
Supplement: d5ew01105a2.xlsx [file d5ew01105a2.xlsx]

## Sheet: Sheet1
Table S2: Individual and co-assembly statistics calculated with QUAST (https://quast.sourceforge.net/). B1 = treatment train 1, B2 = treatment train 2, B3 = treatment train 3, D1 = 11/20/2023, D2 = 11/29/2023, D3 = 12/6/2023, D4 = 2/23/2024.
Assembly Stat	co-assembly	B1_D4	B2_D1	B2_D2	B2_D3	B2_D4	B3_D1	B3_D2	B3_D3	D1	D2	D3	D4
# contigs (>= 0 bp)	36062	3027	5395	2636	2696	2778	2065	3323	5267	8767	7195	9411	5837
# contigs (>= 1000 bp)	35977	3026	5394	2635	2695	2776	2065	3323	5266	8763	7193	9404	5827
# contigs (>= 5000 bp)	34802	2927	5250	2581	2635	2708	1999	3219	5101	8511	6988	9154	5584
# contigs (>= 10000 bp)	25745	2066	3404	1674	1718	1933	1220	2123	3412	5701	4709	6269	3922
# contigs (>= 25000 bp)	10809	822	1143	518	572	711	344	678	1082	1884	1544	2031	1516
# contigs (>= 50000 bp)	4070	312	387	151	182	270	85	200	391	731	558	732	574
Total length (>= 0 bp)	1021638020	88695443	112913400	51252719	56365895	82210428	35295637	67754173	114906968	199618357	164531359	219556880	171000607
Total length (>= 1000 bp)	1021578635	88694615	112912646	51252068	56365004	82209149	35295637	67754173	114906434	199615160	164529481	219552446	170993648
Total length (>= 5000 bp)	1016962934	88303996	112301130	51016870	56103008	81937476	34996968	67317356	114203338	198550946	163687802	218530725	170044683
Total length (>= 10000 bp)	947091464	81626248	98014565	43962560	49032513	75890328	28906092	58844766	101056262	176762938	146012757	196139850	157250404
Total length (>= 25000 bp)	710124212	62224470	63286796	26643201	31884824	56822691	15822751	36613760	65439059	118231614	97146988	130682022	119545084
Total length (>= 50000 bp)	474882630	44126346	36854347	14093418	18301123	41464924	6971964	19815398	41688491	78731333	63441720	86317726	87166073
# contigs (> = 500 bp)	36057	3027	5395	2636	2696	2778	2065	3323	5267	8767	7195	9411	5837
Largest contig	8873361	8873367	951564	548062	670790	8873389	194531	1206469	1769277	1919128	1862168	2357414	8873362
Total length	1021635842	88695443	112913400	51252719	56365895	82210428	35295637	67754173	114906968	199618357	164531359	219556880	171000607
GC (%)	60.22	59.09	61.77	63.03	63.95	59.69	62.03	62.31	63.35	61.03	61.76	62.4	58.2
N50	44979	49608	30339	26337	30630	50587	21609	27987	31163	34127	33269	34030	51740
N90	11472	11078	9014	8882	8955	11125	8276	8975	9327	9496	9575	9718	11019
auN	274149	1.18312e+06	71637.7	53662.2	76625.9	1.18938e+06	35283.2	79050.1	131460	118535	108044	126310	768987
L50	4830	317	894	479	438	263	423	575	797	1249	1031	1313	542
L90	23168	1895	3784	1904	1898	1753	1535	2349	3657	5998	4920	6417	3603
# N's per 100 kbp	0	0	0	0	0	0	0	0	0	0	0	0	0
