# Supplementary material
Source: Royal Society of Chemistry journal article supplement (doi:10.1039/d5ew01105a)
Supplement: d5ew01105a3.xlsx [file d5ew01105a3.xlsx]

## Sheet: Sheet1
Table S3: Assembly statistics of metagenome-assembled genomes (MAGs) recovered in this study. MAGs presented are the species-level representatives dereplicated at a 95% ANI and annotated with Bakta.
MAG	GTDB Classification	Completeness	Redundancy	Size (bp)	N50	Contigs	GC %	tRNAs	rRNAs	Coding Density	Coding Sequences
bin_maxbin2_D4.002	d__Bacteria p__Bacteroidota c__Bacteroidia o__Chitinophagales f__Chitinophagaceae g__UBA1930 s__UBA1930 sp018061385	99.51	0.99	3992370	3907199	5	32.8	40	3	89.6	3431
bin_metabat2_D4.12	d__Bacteria p__Pseudomonadota c__Gammaproteobacteria o__Burkholderiales f__Rhodocyclaceae g__Accumulibacter s__Accumulibacter propinquus	99.29	1.46	5053906	838866	7	62.4	53	6	90.1	4342
bin_metabat2_co-assembly.255	d__Bacteria p__Pseudomonadota c__Gammaproteobacteria o__Burkholderiales f__Rhodocyclaceae g__SSSZ01 s__SSSZ01 sp009469675	98.46	0	3684930	1149471	4	65.6	48	6	92	3484
bin_maxbin2_D4.005	d__Bacteria p__Pseudomonadota c__Gammaproteobacteria o__Pseudomonadales f__UBA7239 g__UBA7239 s__	98.15	0.74	3080552	2641513	10	48	41	6	94.1	2991
bin_maxbin2_co-assembly.001	d__Bacteria p__Myxococcota c__Polyangia o__Haliangiales f__Haliangiaceae g__UBA2376 s__UBA2376 sp018057825	97.74	2.14	8873361	8873361	1	73.2	77	6	91.9	7161
bin_metabat2_co-assembly.260	d__Bacteria p__Bacteroidota c__Bacteroidia o__Chitinophagales f__Chitinophagaceae g__Ferruginibacter s__	97.04	2.71	5007262	483557	22	39.5	50	3	90.3	4392
bin_metabat2_co-assembly.40	d__Bacteria p__Pseudomonadota c__Gammaproteobacteria o__Burkholderiales f__Burkholderiaceae g__JADKHE01 s__JADKHE01 sp016721925	96.79	3.44	4690784	332785	42	64.8	48	6	87.8	4922
bin_metabat2_D1.57	d__Bacteria p__Nitrospirota c__Nitrospiria o__Nitrospirales f__Nitrospiraceae g__Nitrospira_A s__Nitrospira_A sp009594855	96.76	2.73	3882553	1157607	10	58.9	47	3	88.5	3858
bin_maxbin2_co-assembly.013	d__Bacteria p__Pseudomonadota c__Gammaproteobacteria o__Burkholderiales f__Rhodocyclaceae g__Thauera s__Thauera aminoaromatica	96.21	0.55	4480834	547718	32	68.8	61	12	88.6	4049
bin_metabat2_co-assembly.17	d__Bacteria p__Actinomycetota c__Acidimicrobiia o__Acidimicrobiales f__Microtrichaceae g__JADJBW01 s__JADJBW01 sp016703525	95.73	1.28	4167506	920226	10	69.4	45	3	91.7	3887
bin_metabat2_co-assembly.261	d__Bacteria p__Pseudomonadota c__Gammaproteobacteria o__Xanthomonadales f__Rhodanobacteraceae g__Dokdonella s__Dokdonella sp016712865	95.43	0.35	3599649	1048435	7	62.3	53	3	87.8	3304
bin_metabat2_co-assembly.133	d__Bacteria p__Bacteroidota c__Bacteroidia o__Chitinophagales f__Chitinophagaceae g__Ferruginibacter s__Ferruginibacter sp017303335	94.58	2.71	3924552	427021	12	50.2	41	3	90.3	3599
bin_metabat2_co-assembly.313	d__Bacteria p__Myxococcota c__Polyangia o__Polyangiales f__Polyangiaceae g__Chondromyces s__	94.19	9.13	13784235	2162586	7	72	90	6	92.2	10619
bin_metabat2_co-assembly.284	d__Bacteria p__Pseudomonadota c__Gammaproteobacteria o__Burkholderiales f__Burkholderiaceae g__Giesbergeria s__Giesbergeria sp010020825	93.91	7.2	3908879	152191	51	65.8	58	8	87.5	3932
bin_metabat2_B2_D4.34	d__Bacteria p__Actinomycetota c__Actinomycetes o__Actinomycetales f__Dermatophilaceae g__JADJVJ01 s__	93.74	0.54	3022043	1233745	7	69.6	46	3	91.1	2920
bin_maxbin2_co-assembly.008	d__Bacteria p__Bacteroidota c__Bacteroidia o__Cytophagales f__Spirosomataceae g__Runella s__	93.3	0.6	7648231	324215	65	42.4	42	10	89.6	6794
bin_maxbin2_co-assembly.010	d__Bacteria p__Pseudomonadota c__Gammaproteobacteria o__Burkholderiales f__Rhodocyclaceae g__Accumulibacter s__Accumulibacter sp017302455	92.96	2.02	5119883	101330	85	64.5	42	3	87.4	5103
bin_metabat2_co-assembly.14	d__Bacteria p__Pseudomonadota c__Gammaproteobacteria o__Burkholderiales f__Rhodocyclaceae g__SSSZ01 s__SSSZ01 sp016720065	92.22	5.64	3673574	631044	11	65.7	49	6	91.1	3427
bin_metabat2_co-assembly.309	d__Bacteria p__Bacteroidota c__Bacteroidia o__B-17B0 f__B-17BO g__UBA2475 s__	91.75	0.48	3654456	2613696	3	35.4	34	6	92	3180
bin_metabat2_co-assembly.57	d__Bacteria p__Bacteroidota c__Bacteroidia o__Chitinophagales f__Chitinophagaceae g__CAIVPM01 s__	91.36	2.22	3020734	86311	56	32.2	27	3	87.4	2964
bin_metabat2_co-assembly.270	d__Bacteria p__Pseudomonadota c__Gammaproteobacteria o__Burkholderiales f__Rhodocyclaceae g__Azospira_A s__Azospira_A sp022705165	91.25	0	3037624	1914539	11	64	42	3	91.4	2935
bin_metabat2_co-assembly.37	d__Bacteria p__Pseudomonadota c__Alphaproteobacteria o__Caulobacterales f__TH1-2 g__RI-43 s__	89.83	1.17	3667087	2179908	4	64.6	49	3	90.2	3810
bin_metabat2_co-assembly.63	d__Bacteria p__Pseudomonadota c__Gammaproteobacteria o__Competibacterales f__Competibacteraceae g__Competibacter_A s__	87.88	3.07	4678947	327762	32	63.2	41	6	85.9	4466
bin_metabat2_co-assembly.196	d__Bacteria p__Pseudomonadota c__Gammaproteobacteria o__Burkholderiales f__Burkholderiaceae g__Piscinibacter s__Piscinibacter sp017983795	87.84	4.07	4604827	469485	17	69.9	48	3	88.8	4511
bin_metabat2_co-assembly.5	d__Bacteria p__Bacteroidota c__Bacteroidia o__Chitinophagales f__BACL12 g__UBA7236 s__	87.68	3.08	4065663	1251658	16	38.2	38	3	89	3642
bin_metabat2_D4.50	d__Bacteria p__Bacteroidota c__Bacteroidia o__Chitinophagales f__UBA2359 g__JADJTE01 s__JADJTE01 sp016711295	87.39	0.49	4101228	80557	70	45.8	39	6	85	3093
bin_metabat2_co-assembly.341	d__Bacteria p__Bacteroidota c__Bacteroidia o__Cytophagales f__Cyclobacteriaceae g__UBA2336 s__	87.09	2.83	3362226	409972	21	43.4	37	6	89.9	3432
bin_metabat2_co-assembly.272	d__Bacteria p__Pseudomonadota c__Gammaproteobacteria o__Burkholderiales f__Rhodocyclaceae g__ s__	87.07	2.42	4158773	103121	57	65.1	43	4	89	3953
bin_metabat2_co-assembly.166	d__Bacteria p__Pseudomonadota c__Gammaproteobacteria o__Burkholderiales f__Rhodocyclaceae g__Accumulibacter s__	85.97	5.74	5010595	182332	69	66.3	41	0	87.2	4709
bin_metabat2_co-assembly.74	d__Bacteria p__Bacteroidota c__Kapaibacteriia o__Kapaibacteriales f__UBA961 g__UBA2353 s__UBA2353 sp017302855	85.7	2.73	3651405	78626	68	38.8	40	9	88	3364
bin_metabat2_co-assembly.199	d__Bacteria p__Actinomycetota c__Acidimicrobiia o__Acidimicrobiales f__Microtrichaceae g__SSF14 s__SSF14 sp019694615	85.6	5.56	5439400	206113	89	67.1	71	3	88.4	5725
bin_metabat2_co-assembly.201	d__Bacteria p__Pseudomonadota c__Alphaproteobacteria o__Sphingomonadales f__Sphingomonadaceae g__Sphingomonas s__	85.29	0.61	2945260	93251	43	67.8	47	3	86	3171
bin_metabat2_co-assembly.217	d__Bacteria p__Pseudomonadota c__Gammaproteobacteria o__Burkholderiales f__Casimicrobiaceae g__Casimicrobium s__Casimicrobium huifangae	85.1	3.48	4412516	99010	81	62.8	47	9	85.6	4658
bin_metabat2_co-assembly.15	d__Bacteria p__Acidobacteriota c__Vicinamibacteria o__Vicinamibacterales f__UBA2999 g__CADEFD01 s__	84.76	5.98	5540451	314355	38	70.1	45	2	87.7	5290
bin_maxbin2_co-assembly.016_sub	d__Bacteria p__Pseudomonadota c__Gammaproteobacteria o__Burkholderiales f__Burkholderiaceae g__JADJPY01 s__	84.7	4.13	5138328	258810	77	64.1	42	0	90	5417
bin_metabat2_co-assembly.311	d__Bacteria p__Pseudomonadota c__Gammaproteobacteria o__Burkholderiales f__Rhodocyclaceae g__Azonexus s__Azonexus sp009469585	83.58	0.71	3184240	603413	14	65.1	49	6	88.7	3211
bin_metabat2_co-assembly.300	d__Bacteria p__Acidobacteriota c__Vicinamibacteria o__Vicinamibacterales f__UBA2999 g__WHSN01 s__	83.19	8.55	5977833	183275	60	67.8	51	3	87.9	5681
bin_metabat2_co-assembly.231	d__Bacteria p__Pseudomonadota c__Alphaproteobacteria o__Sphingomonadales f__Sphingomonadaceae g__Sphingorhabdus_B s__Sphingorhabdus_B lacus	82.42	3.4	2720075	77451	63	57.3	31	0	89.1	3121
bin_maxbin2_co-assembly.116	d__Bacteria p__Acidobacteriota c__Blastocatellia o__Pyrinomonadales f__Pyrinomonadaceae g__OLB17 s__OLB17 sp937941715	82.34	4.28	3772653	65943	86	55.5	41	0	86.4	4251
bin_metabat2_co-assembly.236	d__Bacteria p__Pseudomonadota c__Gammaproteobacteria o__Burkholderiales f__Nitrosomonadaceae g__Nitrosomonas s__Nitrosomonas sp008015595	82.07	1.32	2266112	1217779	10	42.3	40	3	90.1	2104
bin_maxbin2_co-assembly.007_sub	d__Bacteria p__Pseudomonadota c__Gammaproteobacteria o__Burkholderiales f__Rhodocyclaceae g__Zoogloea s__Zoogloea sp008011925	81.99	1.1	3665863	272676	33	64.6	53	3	89.5	3511
bin_metabat2_co-assembly.82_sub	d__Bacteria p__Bacteroidota c__Bacteroidia o__NS11-12g f__UKL13-3 g__JAGPCK01 s__	81.89	1.67	3233711	55271	86	41.1	23	2	88.3	3654
bin_metabat2_co-assembly.97	d__Bacteria p__Pseudomonadota c__Gammaproteobacteria o__Burkholderiales f__Thiobacillaceae g__PFJX01 s__PFJX01 sp016719465	81.5	1.13	3125387	106018	53	65.9	43	3	84.6	3405
bin_maxbin2_co-assembly.017	d__Bacteria p__Bacteroidota c__Kapaibacteriia o__Kapaibacteriales f__UBA961 g__JADJXV01 s__	81.42	0.02	4680856	90375	80	45.9	41	5	85.6	4105
bin_metabat2_co-assembly.305	d__Bacteria p__Bacteroidota c__Bacteroidia o__Flavobacteriales f__Flavobacteriaceae g__Flavobacterium s__Flavobacterium lutivivi	80.07	2.83	2881710	81222	66	32.7	39	3	82.6	3928
bin_metabat2_co-assembly.148	d__Bacteria p__Bacteroidota c__Bacteroidia o__AKYH767-A f__OLB10 g__JAEUTH01 s__JAEUTH01 sp016788165	79.83	1.67	3049773	115462	42	38	33	3	90.3	2553
bin_metabat2_D3.11	d__Bacteria p__Actinomycetota c__Actinomycetes o__S36-B12 f__UBA10799 g__JADKAV01 s__JADKAV01 sp937952095	78.53	6.22	3455191	86991	70	67.3	45	4	87	4021
bin_metabat2_co-assembly.164	d__Bacteria p__Acidobacteriota c__Thermoanaerobaculia o__Multivoradales f__UBA5704 g__JAGPDF01 s__	77.8	8.55	4836044	193476	48	67.5	53	6	89.2	4419
bin_metabat2_co-assembly.80	d__Bacteria p__Bacteroidota c__Bacteroidia o__Flavobacteriales f__Crocinitomicaceae g__JADJGJ01 s__	77.57	2.16	2980213	58740	67	38	32	3	90.2	2852
bin_metabat2_co-assembly.109	d__Bacteria p__Pseudomonadota c__Gammaproteobacteria o__Burkholderiales f__Rhodocyclaceae g__Azonexus s__	76.89	2.49	3716809	79257	90	62.6	57	8	85.4	4187
bin_metabat2_D4.11	d__Bacteria p__Pseudomonadota c__Gammaproteobacteria o__Burkholderiales f__Rhodocyclaceae g__Accumulibacter s__Accumulibacter conexus	76.41	2.01	4911077	75790	109	66.6	35	0	84.2	4999
bin_metabat2_co-assembly.147	d__Bacteria p__Pseudomonadota c__Alphaproteobacteria o__Sphingomonadales f__Sphingomonadaceae g__Aquisediminimonas s__	75.92	1.74	2328698	88711	38	59.5	37	2	90	2679
bin_metabat2_co-assembly.249	d__Bacteria p__Pseudomonadota c__Gammaproteobacteria o__Burkholderiales f__Burkholderiaceae g__CAISIP01 s__CAISIP01 sp016790475	75.41	3.93	5276525	93626	91	68.8	37	3	85.5	5582
