# Supplementary material
Source: Royal Society of Chemistry journal article supplement (doi:10.1039/d5ew01105a)
Supplement: d5ew01105a4.xlsx [file d5ew01105a4.xlsx]

## Sheet: Sheet1
Table S4: Average Nucleotide Identity (ANI) between Ca. Accumulibacter MAGs recovered in this study and reference Ca. Accumulibacter MAGs from Petriglieri et al. (2022) and UW 21 from Stewart et al. (2024).
NCBI Accession	Species Classification	Pairwise ANI Comparisons (% ANI)
		MAG 010	MAG 11	MAG 12	MAG 166
GCA_017302435.1	Candidatus Accumulibacter necessarius	81.3109	80.4825	80.7232	80.2279
GCA_016709675.1	Candidatus Accumulibacter proximus	81.2975	80.7409	81.3094	80.5326
GCA_016713625.1	Candidatus Accumulibacter affinis	81.2503	79.8344	81.1	79.6679
GCA_012940005.1	Candidatus Accumulibacter contiguus	81.4672	80.0969	81.3991	79.9379
GCA_002425405.1	Accumulibacter vicinus	80.7633	79.4209	80.6793	79.2782
GCA_013414765.1	Candidatus Accumulibacter cognatus	80.4528	79.5839	80.686	79.9567
This study	Candidatus Accumulibacter propinquus (MAG 12)	81.0947	79.8452	100	79.4655
GCA_016714935.1	Candidatus Accumulibacter propinquus	80.8813	79.7529	98.5423	79.2324
GCA_002345025.1	Candidatus Accumulibacter iunctus	80.6221	88.7188	79.7461	86.6842
This study	Candidatus Accumulibacter sp. (MAG 166)	80.0988	88.1111	79.3559	100
GCA_000585015.1	Candidatus Accumulibacter adjunctus	79.7932	87.794	79.2266	94.7105
GCA_013347225.1	Candidatus Accumulibacter similis	80.2675	92.0187	79.6056	87.4383
This study	Candidatus Accumulibacter conexus (MAG 11)	80.775	100	79.77	88.0628
GCA_017592775.1	Candidatus Accumulibacter conexus	80.7586	96.2338	79.6767	87.7393
GCA_900089955.1	Candidatus Accumulibacter aalborgensis	82.1387	79.3758	80.1989	78.8795
This study	Candidatus Accumulibacter phosphatis (MAG 010)	100	80.8009	81.1407	80.0546
GCA_000024165.1	Candidatus Accumulibacter phosphatis UW1	96.5533	80.2682	80.6677	80.0625
GCA_013823155.1	Candidatus Accumulibacter DS2_011	79.6867	79.4087	79.0064	78.8163
GCA_001897745.1	Candidatus Accumulibacter sp. 66-26	79.6726	79.4337	78.8151	78.8959
GCA_017592785.1	Candidatus Accumulibacter regalis	80.239	79.454	79.297	78.8992
GCA_003332265.1	Candidatus Accumulibacter meliphilus	80.1434	79.1256	79.1753	78.5968
GCA_000585055.1	Candidatus Accumulibacter appositus	80.3977	78.8283	79.3739	78.5574
GCA_000987445.1	Candidatus Accumulibacter adiacens	80.0868	79.4209	79.128	78.9428
GCA_000519045.1	Azonexus agitata	Outgroup
GCA_001551835.1	Azonexus denitrificans
GCA_036625195.1	Candidatus Accumulibacter UW 21	-	-	-	97.0856
