# Supplementary material
Source: Royal Society of Chemistry journal article supplement (doi:10.1039/d5ew01105a)
Supplement: d5ew01105a5.xlsx [file d5ew01105a5.xlsx]

## Sheet: output
Table S5: FastANI comparison of Azonexus and family Azonexaceae MAGs recovered in this study to GTDB Azonexus species representatives.
This Study MAGs	GTDB Azonexus Species Representatives	ANI %	Fragments Aligned	Total Fragments
bin_metabat2_co-assembly.109.fa	GCA_020621865.1_ASM2062186v1_genomic.fna	92.4861	696	1194
bin_metabat2_co-assembly.109.fa	GCA_903922075.1_freshwater_MAG_---_Loclat_bin-15563_genomic.fna	89.3677	610	1194
bin_metabat2_co-assembly.109.fa	GCA_017983615.1_ASM1798361v1_genomic.fna	88.7028	703	1194
bin_metabat2_co-assembly.109.fa	GCA_946479855.1_SRR10754058_bin.13_metawrap_v1.3.0_MAG_genomic.fna	85.6385	573	1194
bin_metabat2_co-assembly.109.fa	GCA_009469585.1_ASM946958v1_genomic.fna	85.2646	686	1194
bin_metabat2_co-assembly.109.fa	GCF_945957265.1_SRR12456164_bin.2_metaWRAP_v1.3_MAG_genomic.fna	84.8427	643	1194
bin_metabat2_co-assembly.109.fa	GCF_022012295.1_ASM2201229v1_genomic.fna	84.7285	684	1194
bin_metabat2_co-assembly.109.fa	GCF_009469615.1_ASM946961v1_genomic.fna	84.4284	642	1194
bin_metabat2_co-assembly.109.fa	GCF_020510565.1_ASM2051056v1_genomic.fna	84.2134	687	1194
bin_metabat2_co-assembly.109.fa	GCF_020510625.1_ASM2051062v1_genomic.fna	84.1374	657	1194
bin_metabat2_co-assembly.109.fa	GCA_028687035.1_ASM2868703v1_genomic.fna	84.1016	601	1194
bin_metabat2_co-assembly.109.fa	GCA_030691385.1_ASM3069138v1_genomic.fna	84.0654	605	1194
bin_metabat2_co-assembly.109.fa	GCF_020510585.1_ASM2051058v1_genomic.fna	83.8793	692	1194
bin_metabat2_co-assembly.109.fa	GCA_017983755.1_ASM1798375v1_genomic.fna	83.8559	468	1194
bin_metabat2_co-assembly.109.fa	GCA_018828385.1_ASM1882838v1_genomic.fna	83.8218	687	1194
bin_metabat2_co-assembly.109.fa	GCA_002840785.1_ASM284078v1_genomic.fna	83.8035	631	1194
bin_metabat2_co-assembly.109.fa	GCA_013335535.1_ASM1333553v1_genomic.fna	83.7386	666	1194
bin_metabat2_co-assembly.109.fa	GCF_009469765.1_ASM946976v1_genomic.fna	83.6945	654	1194
bin_metabat2_co-assembly.109.fa	GCA_008080565.1_ASM808056v1_genomic.fna	83.6197	663	1194
bin_metabat2_co-assembly.109.fa	GCF_028864255.1_ASM2886425v1_genomic.fna	83.6046	643	1194
bin_metabat2_co-assembly.109.fa	GCF_008711155.1_ASM871115v1_genomic.fna	83.5556	642	1194
bin_metabat2_co-assembly.109.fa	GCF_001551835.1_ASM155183v1_genomic.fna	83.5325	672	1194
bin_metabat2_co-assembly.109.fa	GCA_016705475.1_ASM1670547v1_genomic.fna	83.5073	592	1194
bin_metabat2_co-assembly.109.fa	GCA_016790885.1_ASM1679088v1_genomic.fna	83.5005	393	1194
bin_metabat2_co-assembly.109.fa	GCA_002842345.1_ASM284234v1_genomic.fna	83.4774	570	1194
bin_metabat2_co-assembly.109.fa	GCA_002440665.1_ASM244066v1_genomic.fna	83.4217	580	1194
bin_metabat2_co-assembly.109.fa	GCA_018261895.1_ASM1826189v1_genomic.fna	83.4117	566	1194
bin_metabat2_co-assembly.109.fa	GCA_937983545.1_N1_Bin_Bin_168_sub_1_genomic.fna	83.4075	473	1194
bin_metabat2_co-assembly.109.fa	GCF_003634965.1_ASM363496v1_genomic.fna	83.3476	577	1194
bin_metabat2_co-assembly.109.fa	GCF_026261605.1_ASM2626160v1_genomic.fna	83.315	681	1194
bin_metabat2_co-assembly.109.fa	GCA_946477505.1_SRR7287212_bin.7_metawrap_v1.3.0_MAG_genomic.fna	83.2966	468	1194
bin_metabat2_co-assembly.109.fa	GCF_020510525.1_ASM2051052v1_genomic.fna	83.2763	598	1194
bin_metabat2_co-assembly.109.fa	GCA_008933675.1_ASM893367v1_genomic.fna	83.2733	566	1194
bin_metabat2_co-assembly.109.fa	GCF_020510425.1_ASM2051042v1_genomic.fna	83.2132	602	1194
bin_metabat2_co-assembly.109.fa	GCA_002842145.1_ASM284214v1_genomic.fna	83.2052	608	1194
bin_metabat2_co-assembly.109.fa	GCF_020510685.1_ASM2051068v1_genomic.fna	83.1574	611	1194
bin_metabat2_co-assembly.109.fa	GCA_018262195.1_ASM1826219v1_genomic.fna	83.1022	632	1194
bin_metabat2_co-assembly.109.fa	GCA_907163225.1_DEC001_d71_genomic.fna	83.086	606	1194
bin_metabat2_co-assembly.109.fa	GCF_937982035.1_R1_Bin_Bin_26_sub_1_genomic.fna	83.0415	514	1194
bin_metabat2_co-assembly.109.fa	GCA_013363835.1_ASM1336383v1_genomic.fna	82.9605	589	1194
bin_metabat2_co-assembly.109.fa	GCA_002840765.1_ASM284076v1_genomic.fna	82.9247	637	1194
bin_metabat2_co-assembly.109.fa	GCF_000429605.1_ASM42960v1_genomic.fna	82.8551	555	1194
bin_metabat2_co-assembly.109.fa	GCF_001956855.1_ASM195685v1_genomic.fna	82.7682	574	1194
bin_metabat2_co-assembly.109.fa	GCA_002425245.1_ASM242524v1_genomic.fna	82.6917	461	1194
bin_metabat2_co-assembly.109.fa	GCF_021401135.1_ASM2140113v1_genomic.fna	82.6912	560	1194
bin_metabat2_co-assembly.109.fa	GCA_017848965.1_ASM1784896v1_genomic.fna	82.6816	581	1194
bin_metabat2_co-assembly.109.fa	GCA_021782315.1_ASM2178231v1_genomic.fna	82.6748	484	1194
bin_metabat2_co-assembly.109.fa	GCA_018262245.1_ASM1826224v1_genomic.fna	82.6127	530	1194
bin_metabat2_co-assembly.109.fa	GCF_003441615.1_ASM344161v1_genomic.fna	82.5901	566	1194
bin_metabat2_co-assembly.109.fa	GCA_002345845.1_ASM234584v1_genomic.fna	82.5533	580	1194
bin_metabat2_co-assembly.109.fa	GCA_016790815.1_ASM1679081v1_genomic.fna	82.5392	436	1194
bin_metabat2_co-assembly.109.fa	GCA_018261905.1_ASM1826190v1_genomic.fna	82.5306	562	1194
bin_metabat2_co-assembly.109.fa	GCA_903930395.1_freshwater_MAG_---_Loclat_bin-18157_genomic.fna	82.5235	382	1194
bin_metabat2_co-assembly.109.fa	GCA_016791065.1_ASM1679106v1_genomic.fna	82.5174	473	1194
bin_metabat2_co-assembly.109.fa	GCA_012026885.1_ASM1202688v1_genomic.fna	82.4159	483	1194
bin_metabat2_co-assembly.109.fa	GCA_028868235.1_ASM2886823v1_genomic.fna	82.2912	322	1194
bin_metabat2_co-assembly.109.fa	GCA_016790845.1_ASM1679084v1_genomic.fna	82.1801	359	1194
bin_metabat2_co-assembly.109.fa	GCA_017302355.1_ASM1730235v1_genomic.fna	82.0555	447	1194
bin_metabat2_co-assembly.109.fa	GCA_004379165.1_ASM437916v1_genomic.fna	81.95	518	1194
bin_metabat2_co-assembly.109.fa	GCA_030696345.1_ASM3069634v1_genomic.fna	81.8871	536	1194
bin_metabat2_co-assembly.109.fa	GCA_003583745.1_ASM358374v1_genomic.fna	81.8375	566	1194
bin_metabat2_co-assembly.109.fa	GCF_023150235.1_ASM2315023v1_genomic.fna	81.8107	482	1194
bin_metabat2_co-assembly.109.fa	GCF_016864195.1_ASM1686419v1_genomic.fna	81.8081	505	1194
bin_metabat2_co-assembly.109.fa	GCF_020510665.1_ASM2051066v1_genomic.fna	81.7118	507	1194
bin_metabat2_co-assembly.109.fa	GCA_013693915.1_ASM1369391v1_genomic.fna	81.6627	515	1194
bin_metabat2_co-assembly.109.fa	GCA_016709965.1_ASM1670996v1_genomic.fna	81.6224	588	1194
bin_metabat2_co-assembly.109.fa	GCA_031274715.1_ASM3127471v1_genomic.fna	81.599	447	1194
bin_metabat2_co-assembly.109.fa	GCA_031260295.1_ASM3126029v1_genomic.fna	81.553	454	1194
bin_metabat2_co-assembly.109.fa	GCA_030824535.1_ASM3082453v1_genomic.fna	81.5413	466	1194
bin_metabat2_co-assembly.109.fa	GCA_016714975.1_ASM1671497v1_genomic.fna	81.5344	513	1194
bin_metabat2_co-assembly.109.fa	GCA_009779265.1_ASM977926v1_genomic.fna	81.3704	382	1194
bin_metabat2_co-assembly.109.fa	GCF_030824335.1_ASM3082433v1_genomic.fna	81.2879	443	1194
bin_metabat2_co-assembly.109.fa	GCA_009782025.1_ASM978202v1_genomic.fna	81.2821	297	1194
bin_metabat2_co-assembly.109.fa	GCA_016722705.1_ASM1672270v1_genomic.fna	81.04	466	1194
bin_metabat2_co-assembly.109.fa	GCA_016617495.1_ASM1661749v1_genomic.fna	80.9621	439	1194
bin_metabat2_co-assembly.109.fa	GCA_016721185.1_ASM1672118v1_genomic.fna	80.878	497	1194
bin_metabat2_co-assembly.109.fa	GCA_028689015.1_ASM2868901v1_genomic.fna	80.8053	403	1194
bin_metabat2_co-assembly.109.fa	GCA_900549295.1_UMGS1167_genomic.fna	80.5032	372	1194
bin_metabat2_co-assembly.109.fa	GCA_016709495.1_ASM1670949v1_genomic.fna	80.3283	439	1194
bin_metabat2_co-assembly.109.fa	GCF_905120355.1_AN_assembly_genomic.fna	80.25	318	1194
bin_metabat2_co-assembly.109.fa	GCA_937892345.1_SRR6231151_bin.72_CONCOCT_v1.1_MAG_genomic.fna	80.0399	346	1194
bin_metabat2_co-assembly.109.fa	GCA_023150195.1_ASM2315019v1_genomic.fna	79.9508	282	1194
bin_metabat2_co-assembly.109.fa	GCA_011391255.1_ASM1139125v1_genomic.fna	79.5234	370	1194
bin_metabat2_co-assembly.109.fa	GCA_028687645.1_ASM2868764v1_genomic.fna	79.3928	366	1194
bin_metabat2_co-assembly.109.fa	GCA_030697085.1_ASM3069708v1_genomic.fna	79.3903	272	1194
bin_metabat2_co-assembly.109.fa	GCA_031277255.1_ASM3127725v1_genomic.fna	79.3653	347	1194
bin_metabat2_co-assembly.109.fa	GCA_031285115.1_ASM3128511v1_genomic.fna	79.3411	266	1194
bin_metabat2_co-assembly.109.fa	GCA_903951825.1_freshwater_MAG_---_Loc090519-7m_bin-0478_genomic.fna	79.3063	308	1194
bin_metabat2_co-assembly.255.fa	GCF_009469615.1_ASM946961v1_genomic.fna	81.4048	608	1226
bin_metabat2_co-assembly.255.fa	GCA_009469585.1_ASM946958v1_genomic.fna	81.1479	643	1226
bin_metabat2_co-assembly.255.fa	GCF_945957265.1_SRR12456164_bin.2_metaWRAP_v1.3_MAG_genomic.fna	80.8962	617	1226
bin_metabat2_co-assembly.255.fa	GCA_028687035.1_ASM2868703v1_genomic.fna	80.8645	549	1226
bin_metabat2_co-assembly.255.fa	GCF_008711155.1_ASM871115v1_genomic.fna	80.6395	541	1226
bin_metabat2_co-assembly.255.fa	GCA_012026885.1_ASM1202688v1_genomic.fna	80.5236	513	1226
bin_metabat2_co-assembly.255.fa	GCA_017983755.1_ASM1798375v1_genomic.fna	80.5163	438	1226
bin_metabat2_co-assembly.255.fa	GCF_022012295.1_ASM2201229v1_genomic.fna	80.5138	615	1226
bin_metabat2_co-assembly.255.fa	GCF_937982035.1_R1_Bin_Bin_26_sub_1_genomic.fna	80.3823	495	1226
bin_metabat2_co-assembly.255.fa	GCF_003634965.1_ASM363496v1_genomic.fna	80.3552	535	1226
bin_metabat2_co-assembly.255.fa	GCF_028864255.1_ASM2886425v1_genomic.fna	80.3476	564	1226
bin_metabat2_co-assembly.255.fa	GCA_002440665.1_ASM244066v1_genomic.fna	80.3202	534	1226
bin_metabat2_co-assembly.255.fa	GCA_008933675.1_ASM893367v1_genomic.fna	80.3193	515	1226
bin_metabat2_co-assembly.255.fa	GCA_013693915.1_ASM1369391v1_genomic.fna	80.2324	501	1226
bin_metabat2_co-assembly.255.fa	GCA_002425245.1_ASM242524v1_genomic.fna	80.1872	446	1226
bin_metabat2_co-assembly.255.fa	GCA_020621865.1_ASM2062186v1_genomic.fna	80.1684	451	1226
bin_metabat2_co-assembly.255.fa	GCA_002842345.1_ASM284234v1_genomic.fna	80.1672	524	1226
bin_metabat2_co-assembly.255.fa	GCF_026261605.1_ASM2626160v1_genomic.fna	80.156	595	1226
bin_metabat2_co-assembly.255.fa	GCA_017848965.1_ASM1784896v1_genomic.fna	80.1259	536	1226
bin_metabat2_co-assembly.255.fa	GCF_001551835.1_ASM155183v1_genomic.fna	80.0397	570	1226
bin_metabat2_co-assembly.255.fa	GCA_017983615.1_ASM1798361v1_genomic.fna	80.0191	497	1226
bin_metabat2_co-assembly.255.fa	GCF_009469765.1_ASM946976v1_genomic.fna	80.0038	561	1226
bin_metabat2_co-assembly.255.fa	GCA_017302355.1_ASM1730235v1_genomic.fna	79.9954	450	1226
bin_metabat2_co-assembly.255.fa	GCA_946477505.1_SRR7287212_bin.7_metawrap_v1.3.0_MAG_genomic.fna	79.9898	410	1226
bin_metabat2_co-assembly.255.fa	GCA_013363835.1_ASM1336383v1_genomic.fna	79.9776	521	1226
bin_metabat2_co-assembly.255.fa	GCF_000429605.1_ASM42960v1_genomic.fna	79.9758	505	1226
bin_metabat2_co-assembly.255.fa	GCA_937983545.1_N1_Bin_Bin_168_sub_1_genomic.fna	79.9753	413	1226
bin_metabat2_co-assembly.255.fa	GCF_020510425.1_ASM2051042v1_genomic.fna	79.9289	532	1226
bin_metabat2_co-assembly.255.fa	GCA_903922075.1_freshwater_MAG_---_Loclat_bin-15563_genomic.fna	79.9046	436	1226
bin_metabat2_co-assembly.255.fa	GCA_009782025.1_ASM978202v1_genomic.fna	79.8967	316	1226
bin_metabat2_co-assembly.255.fa	GCF_021401135.1_ASM2140113v1_genomic.fna	79.8888	475	1226
bin_metabat2_co-assembly.255.fa	GCA_018261905.1_ASM1826190v1_genomic.fna	79.8778	510	1226
bin_metabat2_co-assembly.255.fa	GCA_002840765.1_ASM284076v1_genomic.fna	79.8398	566	1226
bin_metabat2_co-assembly.255.fa	GCA_030691385.1_ASM3069138v1_genomic.fna	79.8338	490	1226
bin_metabat2_co-assembly.255.fa	GCF_020510565.1_ASM2051056v1_genomic.fna	79.8274	531	1226
bin_metabat2_co-assembly.255.fa	GCA_946479855.1_SRR10754058_bin.13_metawrap_v1.3.0_MAG_genomic.fna	79.8127	428	1226
bin_metabat2_co-assembly.255.fa	GCF_020510525.1_ASM2051052v1_genomic.fna	79.812	524	1226
bin_metabat2_co-assembly.255.fa	GCF_001956855.1_ASM195685v1_genomic.fna	79.7999	483	1226
bin_metabat2_co-assembly.255.fa	GCA_009779265.1_ASM977926v1_genomic.fna	79.7891	414	1226
bin_metabat2_co-assembly.255.fa	GCF_023150235.1_ASM2315023v1_genomic.fna	79.7197	448	1226
bin_metabat2_co-assembly.255.fa	GCA_021782315.1_ASM2178231v1_genomic.fna	79.7128	431	1226
bin_metabat2_co-assembly.255.fa	GCA_031260295.1_ASM3126029v1_genomic.fna	79.7089	444	1226
bin_metabat2_co-assembly.255.fa	GCA_018828385.1_ASM1882838v1_genomic.fna	79.7001	523	1226
bin_metabat2_co-assembly.255.fa	GCA_002345845.1_ASM234584v1_genomic.fna	79.6907	505	1226
bin_metabat2_co-assembly.255.fa	GCA_016790885.1_ASM1679088v1_genomic.fna	79.6655	345	1226
bin_metabat2_co-assembly.255.fa	GCA_031274715.1_ASM3127471v1_genomic.fna	79.6158	448	1226
bin_metabat2_co-assembly.255.fa	GCF_020510685.1_ASM2051068v1_genomic.fna	79.6123	566	1226
bin_metabat2_co-assembly.255.fa	GCF_020510625.1_ASM2051062v1_genomic.fna	79.6078	499	1226
bin_metabat2_co-assembly.255.fa	GCF_020510585.1_ASM2051058v1_genomic.fna	79.5937	514	1226
bin_metabat2_co-assembly.255.fa	GCA_016714975.1_ASM1671497v1_genomic.fna	79.5761	468	1226
bin_metabat2_co-assembly.255.fa	GCA_018261895.1_ASM1826189v1_genomic.fna	79.56	447	1226
bin_metabat2_co-assembly.255.fa	GCA_004379165.1_ASM437916v1_genomic.fna	79.5381	461	1226
bin_metabat2_co-assembly.255.fa	GCA_016791065.1_ASM1679106v1_genomic.fna	79.5286	431	1226
bin_metabat2_co-assembly.255.fa	GCA_900549295.1_UMGS1167_genomic.fna	79.496	381	1226
bin_metabat2_co-assembly.255.fa	GCA_002840785.1_ASM284078v1_genomic.fna	79.4886	491	1226
bin_metabat2_co-assembly.255.fa	GCA_013335535.1_ASM1333553v1_genomic.fna	79.4674	520	1226
bin_metabat2_co-assembly.255.fa	GCF_003441615.1_ASM344161v1_genomic.fna	79.4149	458	1226
bin_metabat2_co-assembly.255.fa	GCA_907163225.1_DEC001_d71_genomic.fna	79.4024	468	1226
bin_metabat2_co-assembly.255.fa	GCA_016790845.1_ASM1679084v1_genomic.fna	79.3318	315	1226
bin_metabat2_co-assembly.255.fa	GCA_016705475.1_ASM1670547v1_genomic.fna	79.3221	475	1226
bin_metabat2_co-assembly.255.fa	GCA_008080565.1_ASM808056v1_genomic.fna	79.2684	526	1226
bin_metabat2_co-assembly.255.fa	GCA_030824535.1_ASM3082453v1_genomic.fna	79.2567	383	1226
bin_metabat2_co-assembly.255.fa	GCA_003583745.1_ASM358374v1_genomic.fna	79.2451	460	1226
bin_metabat2_co-assembly.255.fa	GCA_002842145.1_ASM284214v1_genomic.fna	79.1939	454	1226
bin_metabat2_co-assembly.255.fa	GCA_016617495.1_ASM1661749v1_genomic.fna	79.1846	390	1226
bin_metabat2_co-assembly.255.fa	GCF_016864195.1_ASM1686419v1_genomic.fna	79.1814	387	1226
bin_metabat2_co-assembly.255.fa	GCA_016722705.1_ASM1672270v1_genomic.fna	79.1606	433	1226
bin_metabat2_co-assembly.255.fa	GCF_020510665.1_ASM2051066v1_genomic.fna	79.1052	406	1226
bin_metabat2_co-assembly.255.fa	GCA_018262195.1_ASM1826219v1_genomic.fna	79.07	436	1226
bin_metabat2_co-assembly.255.fa	GCA_028868235.1_ASM2886823v1_genomic.fna	79.0328	239	1226
bin_metabat2_co-assembly.255.fa	GCF_905120355.1_AN_assembly_genomic.fna	79.0231	313	1226
bin_metabat2_co-assembly.255.fa	GCA_016790815.1_ASM1679081v1_genomic.fna	78.9871	331	1226
bin_metabat2_co-assembly.255.fa	GCA_903930395.1_freshwater_MAG_---_Loclat_bin-18157_genomic.fna	78.8784	327	1226
bin_metabat2_co-assembly.255.fa	GCA_031277255.1_ASM3127725v1_genomic.fna	78.7926	362	1226
bin_metabat2_co-assembly.255.fa	GCF_030824335.1_ASM3082433v1_genomic.fna	78.7554	333	1226
bin_metabat2_co-assembly.255.fa	GCA_028689015.1_ASM2868901v1_genomic.fna	78.7188	321	1226
bin_metabat2_co-assembly.255.fa	GCA_016721185.1_ASM1672118v1_genomic.fna	78.6038	365	1226
bin_metabat2_co-assembly.255.fa	GCA_018262245.1_ASM1826224v1_genomic.fna	78.587	353	1226
bin_metabat2_co-assembly.255.fa	GCA_030696345.1_ASM3069634v1_genomic.fna	78.5556	447	1226
bin_metabat2_co-assembly.255.fa	GCA_016709495.1_ASM1670949v1_genomic.fna	78.4981	318	1226
bin_metabat2_co-assembly.255.fa	GCA_016709965.1_ASM1670996v1_genomic.fna	78.4389	356	1226
bin_metabat2_co-assembly.255.fa	GCA_031285115.1_ASM3128511v1_genomic.fna	78.3922	281	1226
bin_metabat2_co-assembly.255.fa	GCA_023150195.1_ASM2315019v1_genomic.fna	78.1666	218	1226
bin_metabat2_co-assembly.255.fa	GCA_011391255.1_ASM1139125v1_genomic.fna	78.0519	258	1226
bin_metabat2_co-assembly.255.fa	GCA_937892345.1_SRR6231151_bin.72_CONCOCT_v1.1_MAG_genomic.fna	78.0121	238	1226
bin_metabat2_co-assembly.255.fa	GCA_903951825.1_freshwater_MAG_---_Loc090519-7m_bin-0478_genomic.fna	77.6988	262	1226
bin_metabat2_co-assembly.255.fa	GCA_028687645.1_ASM2868764v1_genomic.fna	77.6693	255	1226
bin_metabat2_co-assembly.255.fa	GCA_030697085.1_ASM3069708v1_genomic.fna	77.3188	186	1226
bin_metabat2_co-assembly.311.fa	GCA_009469585.1_ASM946958v1_genomic.fna	99.0081	972	1054
bin_metabat2_co-assembly.311.fa	GCA_020621865.1_ASM2062186v1_genomic.fna	84.7706	616	1054
bin_metabat2_co-assembly.311.fa	GCF_945957265.1_SRR12456164_bin.2_metaWRAP_v1.3_MAG_genomic.fna	84.6502	708	1054
bin_metabat2_co-assembly.311.fa	GCA_903922075.1_freshwater_MAG_---_Loclat_bin-15563_genomic.fna	84.5025	552	1054
bin_metabat2_co-assembly.311.fa	GCA_017983615.1_ASM1798361v1_genomic.fna	84.3355	662	1054
bin_metabat2_co-assembly.311.fa	GCF_022012295.1_ASM2201229v1_genomic.fna	84.3258	716	1054
bin_metabat2_co-assembly.311.fa	GCF_009469615.1_ASM946961v1_genomic.fna	84.2902	687	1054
bin_metabat2_co-assembly.311.fa	GCA_028687035.1_ASM2868703v1_genomic.fna	84.0043	651	1054
bin_metabat2_co-assembly.311.fa	GCA_946479855.1_SRR10754058_bin.13_metawrap_v1.3.0_MAG_genomic.fna	83.6981	563	1054
bin_metabat2_co-assembly.311.fa	GCA_017983755.1_ASM1798375v1_genomic.fna	83.5836	527	1054
bin_metabat2_co-assembly.311.fa	GCA_030691385.1_ASM3069138v1_genomic.fna	83.5321	644	1054
bin_metabat2_co-assembly.311.fa	GCF_003634965.1_ASM363496v1_genomic.fna	83.4754	645	1054
bin_metabat2_co-assembly.311.fa	GCF_020510565.1_ASM2051056v1_genomic.fna	83.4301	730	1054
bin_metabat2_co-assembly.311.fa	GCA_008933675.1_ASM893367v1_genomic.fna	83.3547	623	1054
bin_metabat2_co-assembly.311.fa	GCF_028864255.1_ASM2886425v1_genomic.fna	83.3089	679	1054
bin_metabat2_co-assembly.311.fa	GCF_009469765.1_ASM946976v1_genomic.fna	83.2949	697	1054
bin_metabat2_co-assembly.311.fa	GCA_002842345.1_ASM284234v1_genomic.fna	83.2654	654	1054
bin_metabat2_co-assembly.311.fa	GCF_001551835.1_ASM155183v1_genomic.fna	83.264	693	1054
bin_metabat2_co-assembly.311.fa	GCA_018828385.1_ASM1882838v1_genomic.fna	83.2621	716	1054
bin_metabat2_co-assembly.311.fa	GCA_002440665.1_ASM244066v1_genomic.fna	83.2553	608	1054
bin_metabat2_co-assembly.311.fa	GCA_016790885.1_ASM1679088v1_genomic.fna	83.2233	413	1054
bin_metabat2_co-assembly.311.fa	GCA_002840785.1_ASM284078v1_genomic.fna	83.1917	671	1054
bin_metabat2_co-assembly.311.fa	GCF_020510585.1_ASM2051058v1_genomic.fna	83.0388	745	1054
bin_metabat2_co-assembly.311.fa	GCF_008711155.1_ASM871115v1_genomic.fna	83.0231	654	1054
bin_metabat2_co-assembly.311.fa	GCF_026261605.1_ASM2626160v1_genomic.fna	83.0062	720	1054
bin_metabat2_co-assembly.311.fa	GCF_937982035.1_R1_Bin_Bin_26_sub_1_genomic.fna	82.9705	578	1054
bin_metabat2_co-assembly.311.fa	GCF_020510625.1_ASM2051062v1_genomic.fna	82.9589	707	1054
bin_metabat2_co-assembly.311.fa	GCA_002425245.1_ASM242524v1_genomic.fna	82.9549	503	1054
bin_metabat2_co-assembly.311.fa	GCF_000429605.1_ASM42960v1_genomic.fna	82.9347	602	1054
bin_metabat2_co-assembly.311.fa	GCA_002840765.1_ASM284076v1_genomic.fna	82.9043	667	1054
bin_metabat2_co-assembly.311.fa	GCA_013363835.1_ASM1336383v1_genomic.fna	82.8978	607	1054
bin_metabat2_co-assembly.311.fa	GCA_008080565.1_ASM808056v1_genomic.fna	82.8957	676	1054
bin_metabat2_co-assembly.311.fa	GCA_013335535.1_ASM1333553v1_genomic.fna	82.8594	700	1054
bin_metabat2_co-assembly.311.fa	GCA_017848965.1_ASM1784896v1_genomic.fna	82.8286	645	1054
bin_metabat2_co-assembly.311.fa	GCA_016705475.1_ASM1670547v1_genomic.fna	82.8104	629	1054
bin_metabat2_co-assembly.311.fa	GCA_018261895.1_ASM1826189v1_genomic.fna	82.8082	618	1054
bin_metabat2_co-assembly.311.fa	GCA_946477505.1_SRR7287212_bin.7_metawrap_v1.3.0_MAG_genomic.fna	82.78	491	1054
bin_metabat2_co-assembly.311.fa	GCF_020510425.1_ASM2051042v1_genomic.fna	82.7222	670	1054
bin_metabat2_co-assembly.311.fa	GCA_002842145.1_ASM284214v1_genomic.fna	82.7205	637	1054
bin_metabat2_co-assembly.311.fa	GCA_937983545.1_N1_Bin_Bin_168_sub_1_genomic.fna	82.7081	501	1054
bin_metabat2_co-assembly.311.fa	GCF_020510525.1_ASM2051052v1_genomic.fna	82.6651	662	1054
bin_metabat2_co-assembly.311.fa	GCA_012026885.1_ASM1202688v1_genomic.fna	82.5599	546	1054
bin_metabat2_co-assembly.311.fa	GCA_907163225.1_DEC001_d71_genomic.fna	82.5397	633	1054
bin_metabat2_co-assembly.311.fa	GCF_021401135.1_ASM2140113v1_genomic.fna	82.4895	617	1054
bin_metabat2_co-assembly.311.fa	GCF_020510685.1_ASM2051068v1_genomic.fna	82.4707	676	1054
bin_metabat2_co-assembly.311.fa	GCF_001956855.1_ASM195685v1_genomic.fna	82.4497	631	1054
bin_metabat2_co-assembly.311.fa	GCA_016791065.1_ASM1679106v1_genomic.fna	82.3238	528	1054
bin_metabat2_co-assembly.311.fa	GCA_002345845.1_ASM234584v1_genomic.fna	82.313	627	1054
bin_metabat2_co-assembly.311.fa	GCF_003441615.1_ASM344161v1_genomic.fna	82.2404	596	1054
bin_metabat2_co-assembly.311.fa	GCA_018262195.1_ASM1826219v1_genomic.fna	82.1526	637	1054
bin_metabat2_co-assembly.311.fa	GCA_016790815.1_ASM1679081v1_genomic.fna	82.1068	475	1054
bin_metabat2_co-assembly.311.fa	GCA_017302355.1_ASM1730235v1_genomic.fna	82.1022	478	1054
bin_metabat2_co-assembly.311.fa	GCA_016790845.1_ASM1679084v1_genomic.fna	82.025	367	1054
bin_metabat2_co-assembly.311.fa	GCA_021782315.1_ASM2178231v1_genomic.fna	82.0175	540	1054
bin_metabat2_co-assembly.311.fa	GCA_018261905.1_ASM1826190v1_genomic.fna	82.0117	636	1054
bin_metabat2_co-assembly.311.fa	GCA_031260295.1_ASM3126029v1_genomic.fna	81.9437	490	1054
bin_metabat2_co-assembly.311.fa	GCA_031274715.1_ASM3127471v1_genomic.fna	81.9072	478	1054
bin_metabat2_co-assembly.311.fa	GCA_903930395.1_freshwater_MAG_---_Loclat_bin-18157_genomic.fna	81.8966	415	1054
bin_metabat2_co-assembly.311.fa	GCA_004379165.1_ASM437916v1_genomic.fna	81.8234	564	1054
bin_metabat2_co-assembly.311.fa	GCA_013693915.1_ASM1369391v1_genomic.fna	81.7861	592	1054
bin_metabat2_co-assembly.311.fa	GCA_003583745.1_ASM358374v1_genomic.fna	81.6611	623	1054
bin_metabat2_co-assembly.311.fa	GCF_023150235.1_ASM2315023v1_genomic.fna	81.6311	515	1054
bin_metabat2_co-assembly.311.fa	GCA_009779265.1_ASM977926v1_genomic.fna	81.5292	437	1054
bin_metabat2_co-assembly.311.fa	GCA_028868235.1_ASM2886823v1_genomic.fna	81.5275	331	1054
bin_metabat2_co-assembly.311.fa	GCA_018262245.1_ASM1826224v1_genomic.fna	81.5018	540	1054
bin_metabat2_co-assembly.311.fa	GCF_016864195.1_ASM1686419v1_genomic.fna	81.4022	543	1054
bin_metabat2_co-assembly.311.fa	GCA_016714975.1_ASM1671497v1_genomic.fna	81.3698	512	1054
bin_metabat2_co-assembly.311.fa	GCA_009782025.1_ASM978202v1_genomic.fna	81.3273	337	1054
bin_metabat2_co-assembly.311.fa	GCA_030824535.1_ASM3082453v1_genomic.fna	81.3219	505	1054
bin_metabat2_co-assembly.311.fa	GCF_020510665.1_ASM2051066v1_genomic.fna	81.2061	527	1054
bin_metabat2_co-assembly.311.fa	GCA_016722705.1_ASM1672270v1_genomic.fna	80.97	512	1054
bin_metabat2_co-assembly.311.fa	GCA_030696345.1_ASM3069634v1_genomic.fna	80.9325	577	1054
bin_metabat2_co-assembly.311.fa	GCA_016617495.1_ASM1661749v1_genomic.fna	80.9161	457	1054
bin_metabat2_co-assembly.311.fa	GCF_030824335.1_ASM3082433v1_genomic.fna	80.8657	499	1054
bin_metabat2_co-assembly.311.fa	GCA_016709965.1_ASM1670996v1_genomic.fna	80.7375	585	1054
bin_metabat2_co-assembly.311.fa	GCA_028689015.1_ASM2868901v1_genomic.fna	80.7168	464	1054
bin_metabat2_co-assembly.311.fa	GCA_900549295.1_UMGS1167_genomic.fna	80.516	414	1054
bin_metabat2_co-assembly.311.fa	GCA_016721185.1_ASM1672118v1_genomic.fna	80.0743	513	1054
bin_metabat2_co-assembly.311.fa	GCF_905120355.1_AN_assembly_genomic.fna	79.8668	364	1054
bin_metabat2_co-assembly.311.fa	GCA_023150195.1_ASM2315019v1_genomic.fna	79.7042	325	1054
bin_metabat2_co-assembly.311.fa	GCA_937892345.1_SRR6231151_bin.72_CONCOCT_v1.1_MAG_genomic.fna	79.6778	366	1054
bin_metabat2_co-assembly.311.fa	GCA_016709495.1_ASM1670949v1_genomic.fna	79.6117	479	1054
bin_metabat2_co-assembly.311.fa	GCA_011391255.1_ASM1139125v1_genomic.fna	79.4826	396	1054
bin_metabat2_co-assembly.311.fa	GCA_031277255.1_ASM3127725v1_genomic.fna	79.4706	391	1054
bin_metabat2_co-assembly.311.fa	GCA_031285115.1_ASM3128511v1_genomic.fna	79.4618	309	1054
bin_metabat2_co-assembly.311.fa	GCA_028687645.1_ASM2868764v1_genomic.fna	79.0488	368	1054
bin_metabat2_co-assembly.311.fa	GCA_030697085.1_ASM3069708v1_genomic.fna	79.0079	280	1054
bin_metabat2_co-assembly.311.fa	GCA_903951825.1_freshwater_MAG_---_Loc090519-7m_bin-0478_genomic.fna	78.822	351	1054
